# Supplementary material for: Rpd3 interacts with insulin signaling in Drosophila longevity extension
Source: publisher site journal article supplement (doi:10.18632/aging.101110), 2016-11-14
Supplement: Supplementary file 1 [file aging-v8i11-101110-supplementary-material-SD1.pdf]

**SUPPLEMENTAL MATERIAL**

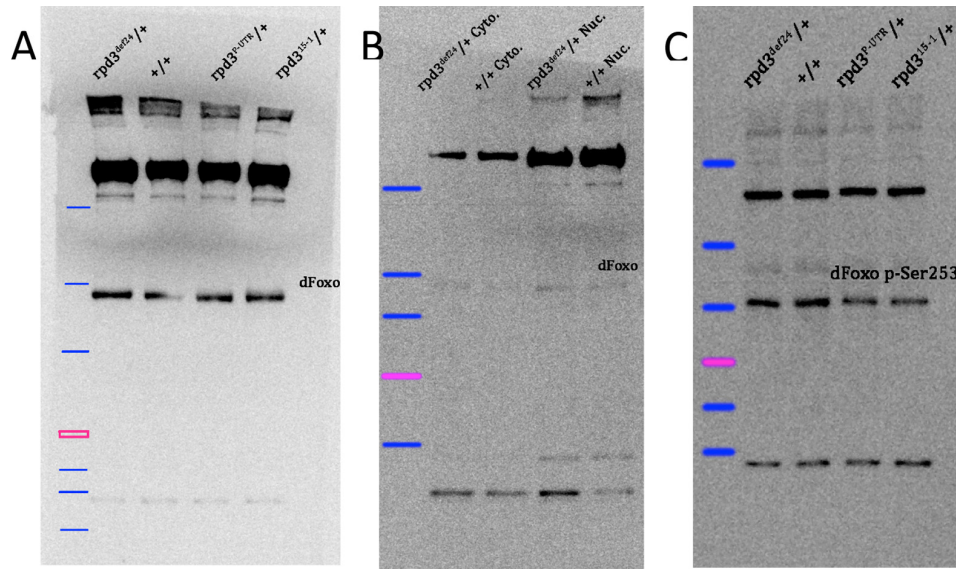

**Supplemental Figure 1.** (A) Western blot staining for dFOXO in 40 day old *rpd3<sup>def24</sup>/+*, control (+/+), *rpd3<sup>P-UTR</sup>/CS* and *rpd3<sup>P-1.8</sup>/CS* male flies. (B) Western blot staining for dFOXO in the cytoplasmic and nuclear fractions of 40 day old *rpd3<sup>def24</sup>/+* and control (+/+) male flies. (C) Western blot staining for phosphorylated Serine 253 dFOXO in 40 day old *rpd3<sup>def24</sup>/+*, control (+/+), *rpd3<sup>P-UTR</sup>/CS*, and *rpd3<sup>P-1.8</sup>/CS* (control) male flies.

**Supplemental Table 1A. Starvation resistance of *rpd3<sup>def</sup>/+* heterozygous flies and genetic controls.**

| Gender | Genotype                    | N  | Age | Mean LS<br>(% change) | Median LS | $\chi^2$ | p        | Maximal life span<br>(% change) |
|--------|-----------------------------|----|-----|-----------------------|-----------|----------|----------|---------------------------------|
| M      | <i>rpd3<sup>def</sup>/+</i> | 39 | 10  | 32 (38)               | 30        | 54.82    | <0.0001* | 44 (40)                         |
| M      | <i>Control</i>              | 31 | 10  | 20                    | 20        |          |          | 26                              |
| F      | <i>rpd3<sup>def</sup>/+</i> | 60 | 10  | 74 (28)               | 53        | 24.880   | <0.0001* | 92 (2)                          |
| F      | <i>Controls</i>             | 75 | 10  | 54                    | 72        |          |          | 90                              |
| M      | <i>rpd3<sup>def</sup>/+</i> | 69 | 40  | 27 (44)               | 30        | 20.9381  | <0.0001* | 37 (11)                         |
| M      | <i>Control</i>              | 17 | 40  | 18                    | 17        |          |          | 34                              |
| F      | <i>rpd3<sup>def</sup>/+</i> | 71 | 40  | 64 (108)              | 61        | 70.1045  | <0.0001* | 96 (54)                         |
| F      | <i>Controls</i>             | 46 | 40  | 31                    | 30        |          |          | 63                              |

The mean, median, and maximal lifespan of *rpd3<sup>def</sup>/+* and genetic control (+/+) heterozygous male (M) and female (F) flies after exposure to starvation at 10 or 40 days of age. Control values are compared to either male or female *rpd3<sup>def</sup>/+* groups to determine the percent change in mean, median, and maximal lifespan. Mean, median, and maximal lifespan are in hours. Log-rank analyses were performed using the JMP 12 program. M = Males, F = Females, N = number of flies in the experiment.

**Supplemental Table 1B. Starvation resistance of *rpd3*<sup>P-UTR</sup> heterozygous flies and genetic controls *rpd3*<sup>P-1.8</sup>/+ flies.**

| Gender | Genotype                        | N  | Age | Mean LS<br>(% change) | Median LS | X <sup>2</sup> | p        | Maximal life span<br>(% change) |
|--------|---------------------------------|----|-----|-----------------------|-----------|----------------|----------|---------------------------------|
| M      | <i>rpd3</i> <sup>P-UTR</sup> /+ | 80 | 10  | 32 (9)                | 31        | 3.6315         | 0.0567   | 38                              |
| M      | <i>rpd3</i> <sup>P-1.8</sup> /+ | 40 | 10  | 29                    | 31        |                |          | 37                              |
| F      | <i>rpd3</i> <sup>P-UTR</sup> /+ | 78 | 10  | 96 (40)               | 99        | 81.6546        | <0.0001* | 139 (36)                        |
| F      | <i>rpd3</i> <sup>P-1.8</sup> /+ | 32 | 10  | 57                    | 55        |                |          | 89                              |

The mean, median, and maximal lifespan of *rpd3*<sup>P-UTR</sup>/+ and their genetic control (*rpd3*<sup>P-1.8</sup>/+) heterozygous male (M) and female (F) flies after exposure to starvation at 10 days of age. Control values are compared to either male or female *rpd3*<sup>P-UTR</sup>/+ to determine the percent change in mean and maximal lifespan. Mean and median lifespan are in hours. N = number of flies in the experiment. Log-rank analyses were performed using the JMP 12 program.

**Supplemental Table 2. *dfoxo* is required for longevity extension in *rpd3*<sup>def</sup> mutant flies**

| Gender | Genotype                                                    | N   | Mean<br>(% change) | Median LS | X <sup>2</sup> | p        | Maximal life span<br>(% change) |
|--------|-------------------------------------------------------------|-----|--------------------|-----------|----------------|----------|---------------------------------|
| M      | <i>rpd3</i> <sup>def</sup> /+                               | 180 | 77.7               | 82        |                |          | 101.1                           |
| M      | <i>rpd3</i> <sup>def</sup> / <i>dfoxo</i> <sup>c01841</sup> | 225 | 65.6 (-16)         | 68        | 65.99          | <0.0001* | 91.5 (-9.5)                     |
| M      | <i>dfoxo</i> <sup>c0184</sup> /+                            | 123 | 50 (36)            | 51        | 176.40         | <0.0001* | 76.7 (-24)                      |
| F      | <i>rpd3</i> <sup>def</sup> /+                               | 200 | 68.6               | 70.5      |                |          | 93.7                            |
| F      | <i>rpd3</i> <sup>def</sup> / <i>dfoxo</i> <sup>c0184</sup>  | 238 | 78.8 (-15)         | 82        | 27.868         | <0.0001* | 101.2 (8)                       |
| F      | <i>dfoxo</i> <sup>c0184</sup> /+                            | 132 | 67 (2)             | 72        | 2.474          | 0.1158   | 91.4 (3)                        |

The mean, median, and maximal lifespans of *rpd3*<sup>def</sup>/+, *rpd3*<sup>def</sup>/*dfoxo*<sup>c01841</sup>, and *dfoxo*<sup>x01841</sup>/+ heterozygous male (M) and female (F) flies. *dfoxo*<sup>x01841</sup> flies are hypomorphic for *dfoxo*. All values are compared to either male or female *rpd3*<sup>def</sup>/+ groups to determine the percent change in median and maximal lifespan. Data are censored for 0-10 days. N: number of flies used in the experiment. Median and maximal lifespan are in days. Log-rank analyses were performed using the JMP 12 program.

**Supplemental Table 3. Heterozygous flies with reduced *rpd3* mRNA levels have increased resistance to H<sub>2</sub>O<sub>2</sub> compared to the genetic control flies at 40 days.**

| Gender | Genotype                      | N  | Age | Mean<br>(% change) | Median LS | $\chi^2$ | p        | Maximal life span<br>(% change) |
|--------|-------------------------------|----|-----|--------------------|-----------|----------|----------|---------------------------------|
| M      | <i>rpd3<sup>def</sup>/+</i>   | 65 | 10  | 34 (-2.5)          | 34        | 0.4934   | 0.4824   | 43 (-8.5)                       |
| M      | <i>Control</i>                | 30 | 10  | 35                 | 34        |          |          | 49                              |
| F      | <i>rpd3<sup>def</sup>/+</i>   | 73 | 10  | 55 (4.9)           | 55        | 1.3942   | 0.2377   | 80 (2.7)                        |
| F      | <i>Controls</i>               | 79 | 10  | 52                 | 55        |          |          | 78                              |
| M      | <i>rpd3<sup>def</sup>/+</i>   | 53 | 40  | 25 (155.8)         | 24        | 31.3716  | 0.0001*  | 31 (17.8)                       |
| M      | <i>Control</i>                | 31 | 40  | 15                 | 12        |          |          | 26                              |
| F      | <i>rpd3<sup>def</sup>/+</i>   | 55 | 40  | 39 (39.5)          | 36        | 5.7003   | 0.0170*  | 56 (-7.9)                       |
| F      | <i>Controls</i>               | 39 | 40  | 28                 | 31        |          |          | 60                              |
| M      | <i>rpd3<sup>P-UTR</sup>/+</i> | 58 | 10  | 39 (-3)            | 38        | 1.4847   | 0.2230   | 48 (-60)                        |
| M      | <i>rpd3<sup>P-1.8</sup>/+</i> | 56 | 10  | 40                 | 40        |          |          | 51                              |
| F      | <i>rpd3<sup>P-UTR</sup>/+</i> | 52 | 10  | 97 (30)            | 92        | 55.2690  | <0.0001* | 116 (20)                        |
| F      | <i>rpd3<sup>P-1.8</sup>/+</i> | 57 | 10  | 68                 | 64        |          |          | 94                              |

The mean, median, and maximal lifespan of *rpd3<sup>def</sup>/+* and genetic control (+/+), *rpd3<sup>P-UTR</sup>/+*, and genetic control (*rpd3<sup>P-1.8</sup>/+*) heterozygous male (M) and female (F) flies after exposure to H<sub>2</sub>O<sub>2</sub> at 10 or 40 days of age. Control values are compared to either male or female *rpd3<sup>def</sup>/+* groups to determine the percent change in mean and maximal lifespan. Mean and median lifespan are in hours. N = number of flies in the experiment. Log-rank analyses were performed using the JMP 12 program.

**Supplemental Table 4. *dfoxo* is required for increased starvation resistance in *rpd3<sup>def</sup>* heterozygous flies at 40 days.**

| Gender | Genotype                                         | N   | Mean<br>(% change) | Median LS | $\chi^2$ | p        |
|--------|--------------------------------------------------|-----|--------------------|-----------|----------|----------|
| M      | <i>rpd3<sup>def</sup>/yw</i>                     | 102 | 29                 | 29        |          |          |
| M      | <i>dfoxo<sup>c01841</sup>/yw</i>                 | 101 | 20 (-31)           | 20        | 82.3659  | <0.0001  |
| M      | <i>rpd3<sup>def</sup>/yw</i>                     | 102 | 29                 | 29        |          |          |
| M      | <i>rpd3<sup>def</sup>/dfoxo<sup>c01841</sup></i> | 60  | 24 (-17)           | 23        | 16.1367  | <0.0001  |
| F      | <i>rpd3<sup>def</sup>/yw</i>                     | 83  | 55                 | 47        |          |          |
| F      | <i>dfoxo<sup>c01841</sup>/yw</i>                 | 94  | 53 (-4)            | 51        | 1.7      | 0.18     |
| F      | <i>rpd3<sup>def</sup>/yw</i>                     | 83  | 55                 | 47        |          |          |
| F      | <i>rpd3<sup>def</sup>/dfoxo<sup>c01841</sup></i> | 90  | 44 (20)            | 45        | 16.3721  | <0.0001* |

The mean and median lifespans of *rpd3<sup>def</sup>/+*, *rpd3<sup>def</sup>/dfoxo<sup>c01841</sup>*, and *dfoxo<sup>c01841</sup>/+* heterozygous male (M) and female (F) flies. *dfoxo<sup>c01841</sup>* flies are hypomorphic for *dfoxo*. All values are compared to either male or female *rpd3<sup>def</sup>/+* groups to determine the percent change in mean and median lifespan. Mean and median lifespan are in hours. The similarity in stress resistance between *rpd3<sup>def</sup>/dfoxo<sup>c01841</sup>* and *dfoxo<sup>c01841</sup>/+* male and female flies was also determined. N: number of flies used in the experiment. Three independent experiments with similar results were combined. Mean and Median lifespans are in hours. Log-rank analyses were performed using the JMP 12 program.

**Supplemental Table 5. *dfoxo* is required for increased H<sub>2</sub>O<sub>2</sub> resistance in *rpd3<sup>def</sup>* heterozygous flies.**

| Gender | Genotype                                         | N   | Mean<br>(% change) | Median LS | $\chi^2$ | p        | Maximal life span<br>(% change) |
|--------|--------------------------------------------------|-----|--------------------|-----------|----------|----------|---------------------------------|
| M      | <i>rpd3<sup>def</sup>/+</i>                      | 166 | 30                 | 32        |          |          | 42                              |
| M      | <i>rpd3<sup>def</sup>/dfoxo<sup>c01841</sup></i> | 82  | 17 (43)            | 18        | 139.6062 | <0.0001* | 24 (42)                         |
| M      | <i>dfoxo<sup>c01841</sup>/+</i>                  | 88  | 21 (30)            | 23        | 82.7128  | <0.0001* | 32 (22)                         |
| F      | <i>rpd3<sup>def</sup>/+</i>                      | 166 | 41                 | 40        |          |          | 57                              |
| F      | <i>rpd3<sup>def</sup>/dfoxo<sup>c01841</sup></i> | 128 | 48 (-17)           | 47        | 26.7491  | <0.0001* | 71 (-20)                        |
| F      | <i>dfoxo<sup>c01841</sup>/+</i>                  | 80  | 30 (27)            | 32        | 89.8302  | <0.0001* | 43 (25)                         |

The mean and median lifespans of *rpd3<sup>def</sup>/+*, *rpd3<sup>def</sup>/dfoxo<sup>c01841</sup>*, and *dfoxo<sup>c01841</sup>/+* heterozygous male (M) and female (F) flies after exposure to H<sub>2</sub>O<sub>2</sub> at 40 days of age. *Dfoxo<sup>c01841</sup>* flies are hypomorphic for *dfoxo*. All values are compared to either male or female *rpd3<sup>def</sup>/+* groups to determine the percent change in mean or median lifespan. N: number of flies used in the experiment. Three independent experiments with similar results were combined. Mean and median lifespan are in hours. Log-rank analyses were performed using the JMP 12 program.
